# Supplementary material for: A Modified Challenge-Based Learning Approach in a Capstone Course to Improve Student Satisfaction and Engagement
Source: PubMed Central journal article supplement — J Microbiol Biol Educ. 2014 Dec 15;15(2):316–8. doi: 10.1128/jmbe.v15i2.742 (PMC4278510; doi:10.1128/jmbe.v15i2.742), 2014-12-15
Supplement: JMBE-15-316-s001.pdf [file JMBE-15-316-s001.pdf]

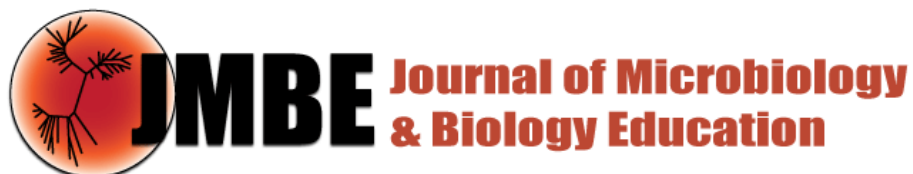

---

## Supplemental Materials

for

### **A Modified Challenge-Based Learning Approach in a Capstone Course to Improve Student Satisfaction and Engagement**

Scott E. Gabriel

*Chemistry Department, Viterbo University, La Crosse, WI 54601*

#### **Table of Contents**

(Total pages 2)

Appendix 1: Oral Presentation Rubric

Corresponding author. Mailing address: 900 Viterbo Drive, Viterbo University, La Crosse, WI 54601. Phone: 608-796-3473. Fax: 608-796-3050. E-mail address: [segabriel@viterbo.edu](mailto:segabriel@viterbo.edu).

©2014 Author(s). Published by the American Society for Microbiology. This is an Open Access article distributed under the terms of the Creative Commons Attribution-Noncommercial-NoDerivatives 4.0 International license (<https://creativecommons.org/licenses/by-nc-nd/4.0/> and <https://creativecommons.org/licenses/by-nc-nd/4.0/legalcode>), which grants the public the nonexclusive right to copy, distribute, or display the published work.

## Oral Presentation Rubric

| CATEGORY/<br>WEIGHT             | 4                                                                                                                                                  | 3                                                                                                                                     | 2                                                                                                                                        | 1                                                                                                                          | Score<br>out of 4 | Weighted<br>Score | Comments |
|---------------------------------|----------------------------------------------------------------------------------------------------------------------------------------------------|---------------------------------------------------------------------------------------------------------------------------------------|------------------------------------------------------------------------------------------------------------------------------------------|----------------------------------------------------------------------------------------------------------------------------|-------------------|-------------------|----------|
| <b>Content Mastery</b><br>(30%) | Shows mastery of the question being addressed from multiple perspectives.                                                                          | Shows a good understanding of the topic from multiple perspectives.                                                                   | Shows a good understanding of parts of the topic (limited in scope).                                                                     | Does not seem to understand the topic very well.                                                                           |                   | x7.5              |          |
| <b>Comprehension</b><br>(20%)   | Student is able to accurately answer all questions posed by classmates about the topic.                                                            | Student is able to accurately answer most questions posed by classmates about the topic.                                              | Student is able to accurately answer a few questions posed by classmates about the topic.                                                | Student is unable to accurately answer questions posed by classmates about the topic.                                      |                   | x5                |          |
| <b>Analysis</b><br>(25%)        | Clear, accurate integration of the literature is included. Both positives and negatives are weighed in presentation and conclusions are justified. | Literature is used and presented well. Analysis is good but not complete and informs the students' opinions.                          | Limited articles used in presentation and not analyzed completely (or only from one side). Opinions are partially supported by research. | Literature review is poor and not looked at with a critical eye. Opinions are only marginally supported by their research. |                   | x4                |          |
| <b>Multimedia</b><br>(10%)      | Student uses several multimedia pieces that show considerable work/creativity and which make the presentation better.                              | Student uses 1 multimedia item that shows considerable work/creativity and which make the presentation better.                        | Student uses 1 multimedia item which makes the presentation better.                                                                      | The student uses no multimedia OR those chosen detract from the presentation.                                              |                   | x2.5              |          |
| <b>Enthusiasm</b><br>(5%)       | Facial expressions and body language generate a strong interest and enthusiasm about the topic in others.                                          | Facial expressions and body language sometimes generate a strong interest and enthusiasm about the topic in others.                   | Facial expressions and body language are used to try to generate enthusiasm, but seem somewhat faked.                                    | Very little use of facial expressions or body language. Did not generate much interest in topic being presented.           |                   | x1.25             |          |
| <b>Preparedness</b><br>(5%)     | Student is completely prepared and has obviously rehearsed and presentation is well-timed.                                                         | Student seems pretty prepared but might have needed a couple more rehearsals. Presentation is slightly over or under.                 | The student is somewhat prepared, but it is clear that rehearsal was lacking.                                                            | Student does not seem at all prepared to present. Presentation significantly over or under.                                |                   | x1.25             |          |
| <b>Vocabulary</b><br>(5%)       | Uses vocabulary appropriate for the audience. Extends audience vocabulary by defining words that might be new to most of the audience.             | Uses vocabulary appropriate for the audience. Includes 1-2 words that might be new to most of the audience, but does not define them. | Uses vocabulary appropriate for the audience. Does not include any vocabulary that might be new to the audience.                         | Uses several (5 or more) words or phrases that are not understood by the audience.                                         |                   | x1.25             |          |
